# Supplementary material for: Cadmium Treatment Alters the Expression of Five Genes at theCda1Locus in Two Soybean Cultivars [Glycine Max(L.) Merr]
Source: Hindawi journal article supplement (doi:10.1155/2014/979750), 2014-01-01
Supplement: f1 [file 979750.f1.pdf]

**Supplementary Table 1.** Ranking of these genes in total samples according to their stability value using NormFinder

|                         | ACT3 |       | RSTK |       | H <sup>+</sup> -ATPase |       | AW1529<br>57 |       | UCP1 |       | ELF1B |       | F-Box |       | PP2A |       | ISCP |       | UCP2 |       | Best<br>Gene | Best combination<br>of two genes |
|-------------------------|------|-------|------|-------|------------------------|-------|--------------|-------|------|-------|-------|-------|-------|-------|------|-------|------|-------|------|-------|--------------|----------------------------------|
| Groups                  | R    | Sv    | R    | Sv    | R                      | Sv    | R            | Sv    | R    | Sv    | R     | Sv    | R     | Sv    | R    | Sv    | R    | Sv    | R    | Sv    |              |                                  |
| Total                   | 2    | 0.465 | 7    | 1.088 | 10                     | 2.669 | 3            | 0.528 | 1    | 0.415 | 6     | 0.735 | 4     | 0.595 | 5    | 0.632 | 9    | 2.362 | 8    | 2.218 | UCP1         |                                  |
| Cultivars               | 2    | 0.090 | 7    | 0.219 | 10                     | 0.546 | 4            | 0.105 | 1    | 0.081 | 6     | 0.142 | 5     | 0.122 | 3    | 0.104 | 9    | 0.484 | 8    | 0.458 | UCP1         | ACT3/ UCP1                       |
| Cd treatments           | 2    | 0.094 | 7    | 0.221 | 10                     | 0.550 | 3            | 0.107 | 1    | 0.074 | 6     | 0.135 | 5     | 0.122 | 4    | 0.109 | 9    | 0.487 | 8    | 0.453 | UCP1         | ACT3/ UCP1                       |
| Times                   | 2    | 0.266 | 7    | 0.465 | 10                     | 0.855 | 5            | 0.412 | 1    | 0.236 | 3     | 0.337 | 4     | 0.369 | 6    | 0.421 | 9    | 0.755 | 8    | 0.726 | UCP1         | ACT3/ UCP1                       |
| Tissues                 | 2    | 0.356 | 7    | 0.889 | 10                     | 2.090 | 5            | 0.468 | 1    | 0.291 | 6     | 0.518 | 3     | 0.405 | 4    | 0.417 | 9    | 2.062 | 8    | 1.757 | UCP1         | ACT3/ UCP1                       |
| Cultivars-Cd            | 2    | 0.108 | 7    | 0.307 | 10                     | 0.787 | 4            | 0.136 | 1    | 0.104 | 6     | 0.174 | 5     | 0.165 | 3    | 0.132 | 9    | 0.700 | 8    | 0.653 | UCP1         | ACT3/ UCP1                       |
| Cultivars-times         | 2    | 0.127 | 7    | 0.397 | 10                     | 1.099 | 3            | 0.135 | 1    | 0.115 | 6     | 0.205 | 4     | 0.184 | 5    | 0.195 | 9    | 1.007 | 8    | 0.925 | UCP1         | ACT3/ UCP1                       |
| Cultivars-tissues       | 2    | 0.495 | 7    | 0.990 | 10                     | 2.153 | 5            | 0.527 | 1    | 0.403 | 6     | 0.606 | 4     | 0.524 | 3    | 0.510 | 9    | 2.088 | 8    | 1.808 | UCP1         | ACT3/ UCP1                       |
| Cultivars-Cd-times      | 2    | 0.143 | 7    | 0.540 | 10                     | 1.668 | 3            | 0.193 | 1    | 0.124 | 6     | 0.233 | 5     | 0.220 | 4    | 0.198 | 9    | 1.522 | 8    | 1.411 | UCP1         | ACT3/ UCP1                       |
| Cultivars-Cd-tissues    | 2    | 0.568 | 7    | 1.094 | 10                     | 2.154 | 4            | 0.664 | 1    | 0.546 | 6     | 0.723 | 5     | 0.683 | 3    | 0.613 | 9    | 2.131 | 8    | 1.854 | UCP1         | ACT3/PP2A                        |
| Cultivars-times-tissues | 2    | 0.674 | 7    | 1.314 | 10                     | 2.284 | 6            | 0.796 | 1    | 0.636 | 5     | 0.771 | 4     | 0.715 | 3    | 0.695 | 9    | 2.163 | 8    | 1.973 | UCP1         | ACT3/UCP1                        |

Note: R: Rank; SV: Stability Value
